# Supplementary material for: Road to Metastasis: The TWEAK Pathway as a Discriminant between Metastasizing and Non-Metastasizing Thick Melanomas
Source: MDPI journal article supplement (doi:10.3390/ijms221910568), 2021-09-29
Supplement: s1 [file s1]

Supplementary Figure S1: Volcano plot Leedsdatabase

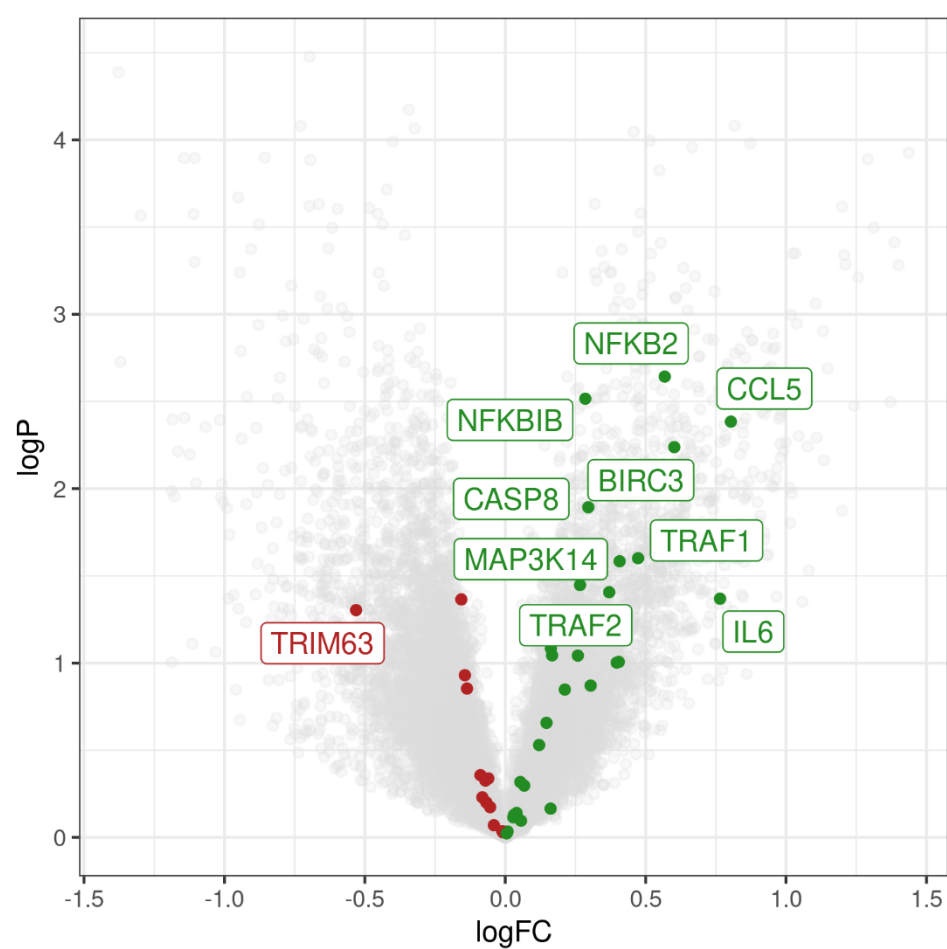

Volcano Plot for differentially gene expression in the Leeds database : red boxes are genes with higher expression in thick M+ (left) , and green boxes are genes with higher expression in thick M- (right) B
