# Supplementary material for: Road to Metastasis: The TWEAK Pathway as a Discriminant between Metastasizing and Non-Metastasizing Thick Melanomas
Source: Int J Mol Sci. 2021 Sep 29;22(19):10568. doi: 10.3390/ijms221910568 (PMC8508767; doi:10.3390/ijms221910568)
Supplement: Supplementary file 1 [file ijms-22-10568-s001.zip]

Archive with 4 entries (4 files):
- supplementary figure S1- Volcano plot Leedsdatabase.pdf
- Supplementary table S1a and S1b The multivariate logistic regression analysis in thick CM-Methods.pdf
- Supplementary table S2 top ten pathway-20-09-2021.xlsx
- Supplementary table S3.xlsx
