# Supplementary material for: Road to Metastasis: The TWEAK Pathway as a Discriminant between Metastasizing and Non-Metastasizing Thick Melanomas
Source: Int J Mol Sci. 2021 Sep 29;22(19):10568. doi: 10.3390/ijms221910568 (PMC8508767; doi:10.3390/ijms221910568)
Supplement: Supplementary file 1 [file ijms-22-10568-s001.zip › Supplementary table S2 top ten pathway-20-09-2021.xlsx]

## Sheet: Blad1
	Supplementary table S2a: The top ten upregulated pathway in thick M-
	pathway	p value
	Estrogen receptor pathway	0.0009
	TNF related weak inducer of apoptosis TWEAK signaling pathway	0.0015
	Glycosphingolipid biosynthesis	0.0015
	chormosomal and microsatellite instability in colorectal cancer	0.0016
	cardiac hypertrophic response	0.002
	MAPK pathway	0.003
	NOD like receptor signaling pathway	0.003
	Glycan biosynthesis	0.004
	p38 alpha beta downstream pathway	0.004
	integrin cel surface interaction	0.004
	Supplementary table S2b: The top ten upregulated pathway in thick M+
	pathway	p value
	Eucaryotic translation elongation	1,00 E-04
	Ribosome	0.00015
	Proteasome	0.00015
	Antigen processing cross presentation	0.00015
	Cross presentation of soluble exogenous antigens endosomes	0.00015
	Metabolism of polyamines	0.00015
	Degradation of DVL	0.00015
	GLI by the proteasome	0.00015
	Hedgehog on state	0.00015
	AUF1 HNRNP DO binds and destabilizes mRNA	0.00015
