# Supplementary material for: Road to Metastasis: The TWEAK Pathway as a Discriminant between Metastasizing and Non-Metastasizing Thick Melanomas
Source: Int J Mol Sci. 2021 Sep 29;22(19):10568. doi: 10.3390/ijms221910568 (PMC8508767; doi:10.3390/ijms221910568)
Supplement: Supplementary file 1 [file ijms-22-10568-s001.zip › Supplementary table S3.xlsx]

## Sheet: Matching prog fac
Supplementary table S3 Matching for all the other prognostic factors
Patient	Metastasied (yes/no)	breslow interval	Gender	Age range	Ulceration (yes/no)	Mitosis (yes/no)	subtype	site
1	no	>4mm	Male	>=60 years	no	yes	NM	Extremity
2	yes	>4mm	Male	>=60 years	no	yes	NM	Extremity
3	no	>4mm	female	>=60 years	no	yes	NM	Trunk
4	yes	>4mm	female	>=60 years	no	yes	NM	Trunk
5	no	>4mm	male	40-59 years	yes	yes	SSM	Trunk
6	yes	>4mm	male	40-59 years	yes	yes	SSM	Trunk
7	no	2mm-4mm	female	40-59 years	no	no	SSM	Extremity
8	yes	2mm-4mm	female	40-59 years	no	no	SSM	Extremity
10	no	2mm-4mm	male	40-59 years	yes	yes	NM	Trunk
9	yes	2mm-4mm	male	40-59 years	yes	yes	NM	Trunk
12	no	2mm-4mm	male	>=60 years	yes	yes	NM	Head and neck
13	no	2mm-4mm	male	>=60 years	yes	yes	NM	Head and neck
11	yes	2mm-4mm	male	>=60 years	yes	yes	NM	Head and neck
14	no	2mm-4mm	female	40-59 years	yes	yes	AL	Extremity
15	yes	2mm-4mm	female	40-59 years	yes	yes	AL	Extremity
16	no	2mm-4mm	male	>=60 years	no	yes	AL	Extremity
17	yes	2mm-4mm	male	>=60 years	no	no	Al	Extremity
18	no	>4mm	male	>=60 years	yes	yes	AL	Extremity
19	yes	>4mm	male	>=60 years	yes	yes	AL	Extremity
20	yes	>4mm	male	>=60 years	yes	yes	AL	Extremity
21	no	>4mm	male	>=60 years	yes	yes	NM	Head and neck
22	yes	>4mm	male	>=60 years	yes	yes	NM	Head and neck
23	no	>4mm	male	>=60 years	yes	yes	NM	Head and neck
24	yes	>4mm	male	>=60 years	yes	no	NM	Head and neck
Abbreviations: SSM: Superficial spreading melanoma; NM: nodular melanoma; AL: AL, acrolentiginous melanoma. Age is expressed in years and Breslow thickness in mm.
